# Supplementary material
Source: PubMed Central journal article supplement (PMC3802528)
Supplement: NIHMS326825-supplement-Supplementary_Data.pdf [file NIHMS326825-supplement-Supplementary_Data.pdf]

# Supplementary Information

for

## Genomic Sequencing of Colorectal Adenocarcinomas Identifies a Recurrent *VTIIA-TCF7L2* Fusion

### Contents

|                                                                                                                               |                        |
|-------------------------------------------------------------------------------------------------------------------------------|------------------------|
| Supplementary Figure 1.....                                                                                                   | Page 2                 |
| <i>Degree of microhomology and types of intrachromosomal rearrangements</i>                                                   |                        |
| Supplementary Figure 2.....                                                                                                   | Page 3                 |
| <i>Validation of the VTIIA-TCF7L2 fusion transcript and requirement for CTNNB1 in colorectal carcinoma cell line NCI-H508</i> |                        |
| Supplementary Table 1.....                                                                                                    | In separate file       |
| <i>Non-synonymous Mutations and Insertions/Deletions Identified Within Coding Genes</i>                                       |                        |
| Supplementary Table 2.....                                                                                                    | Page 4                 |
| <i>Chart of Key Mutations by Tumor Sequenced</i>                                                                              |                        |
| Supplementary Table 3.....                                                                                                    | Page 5                 |
| <i>List of Genes Recurrently Mutated or Rearranged</i>                                                                        |                        |
| Supplementary Table 4.....                                                                                                    | In separate excel file |
| <i>Somatic Rearrangements Identified with dRanger Algorithm</i>                                                               |                        |
| Supplementary Table 5.....                                                                                                    | Page 7                 |
| <i>Primers Used in Validation Studies</i>                                                                                     |                        |
| Supplementary Note.....                                                                                                       | Page 7                 |

# Supplementary Figure 1: Degree of microhomology and types of intrachromosomal rearrangements

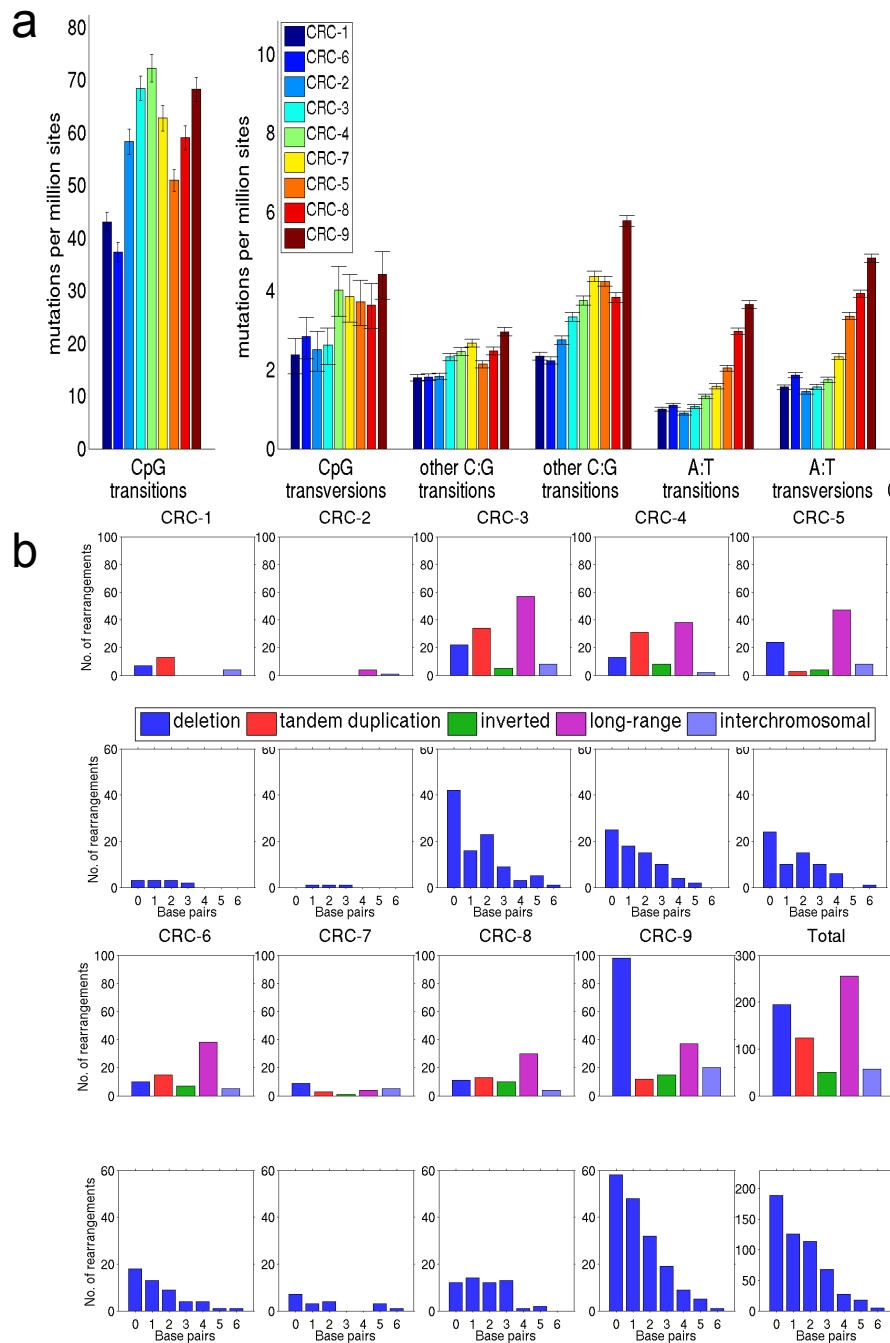

**(a)** The mutation total rates (right) for each sample are shown, with samples ordered by total mutation rate. Category-specific rates for mutations at specific base contexts are also shown, with rates calculated as number of mutations per million covered sites at risk for mutation. Error bars represent 95% confidence intervals. The rate of C>T transitions at CpG dinucleotides are shown on a separate axis (left) due to their much higher rates. **(b)** For each of the tumor genomes are shown the spectrum of microhomology at sites of breakpoints of rearrangements (bottom) and the breakdown of the types of rearrangements (top). The color scheme shows the types of genomic rearrangements identified (deletions, inter-chromosomal fusions, inversions, long-range deletions, tandem duplications) with long-range event representing those bringing together chromosome regions spanning >1Mb separation. **(c)** The amount of microhomology at breakpoints from each type of rearrangement with colors depicting the number of bases with homology.

## Supplementary Figure 2: Validation of the *VT11A-TCF7L2* fusion and *CTNNB1* dependency in NCI-H508

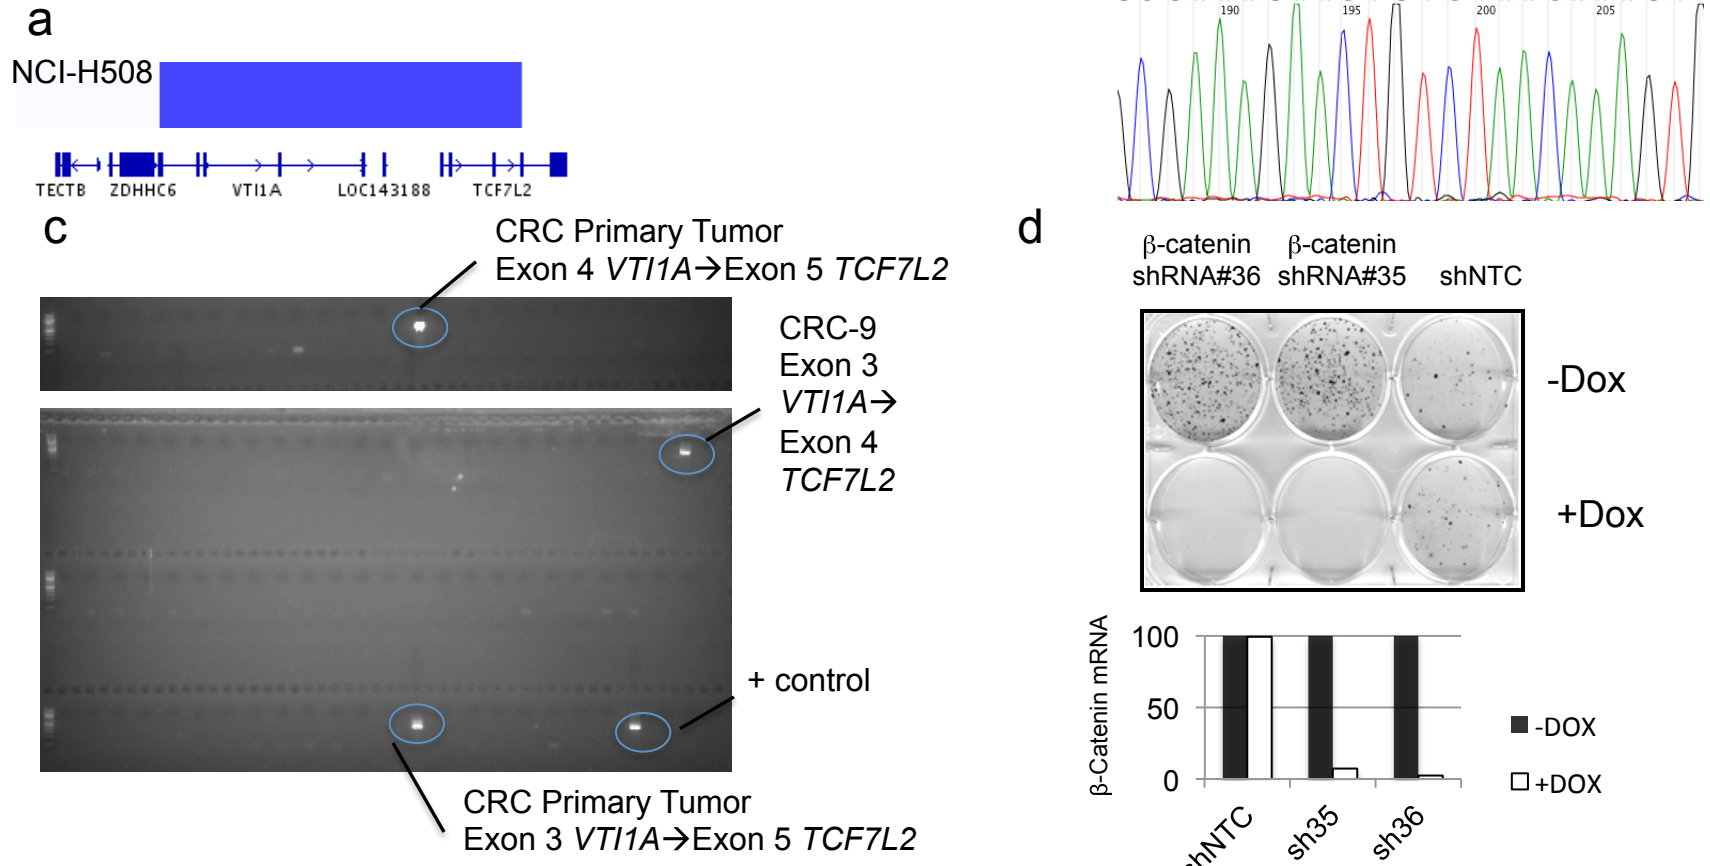

**(a)** Segmented SNP array-derived deletion in chromosome 10 in cell line NCI-H508 showing location of deletion interrupting the adjacent genes *VT11A* and *TCF7L2*. **(b)** Sequence traces from cloned cDNA from NCI-H508 shows the transcript fusing Exon 2 to *VT11A* to Exon 5 of *TCF7L2*. **(c)** The agarose gel containing PCR products from a panel of primary colorectal adenocarcinomas screened for the presence of the *VT11A-TCF7L2* fusion constructs. The marked bands obtained from 3 of 97 samples were subsequently excised, cloned and sequenced with the resulting exon structure of the fusion marked. Of note, these identified fusions all encode an in-frame fusion protein. **(d)** anchorage-independent growth of NCI-H508 cells infected with doxycycline inducible shRNA vectors targeting *CTNNB1* (#35 and #36) or a non-targeting control when cultured without (top) or with doxycycline (bottom) to induce shRNA expression. The bottom plot shows the reduction in *CTNNB1* transcript as measured by quantitative real-time PCR.

Supplementary Table 2: *Chart of Key Mutations by Tumor Sequenced*

|       | <i>TP53</i>                   | <i>APC</i>                 | <i>KRAS</i> | <i>NRAS</i> | <i>PIK3CA</i> | <i>SMAD4</i> |
|-------|-------------------------------|----------------------------|-------------|-------------|---------------|--------------|
| CRC-1 | frameshift<br>(heterozygous)  | nonsense<br>+ frameshift   | G13D        |             |               |              |
| CRC-2 |                               | nonsense<br>+ frameshift   | G13D        |             |               |              |
| CRC-3 |                               |                            |             |             |               | L540R        |
| CRC-4 | nonsense<br>(homozygous)      | nonsense<br>(homozygous)   |             |             |               |              |
| CRC-5 | splice-site<br>(homozygous)   | nonsense<br>(heterozygous) |             | G12V        | F83Y          |              |
| CRC-6 | frameshift<br>(heterozygous)* |                            | G13D        |             |               | G510E        |
| CRC-7 | frameshift<br>(heterozygous)  | nonsense<br>+ nonsense     |             | G13C        |               |              |
| CRC-8 |                               | nonsense<br>(homozygous)*  | G13D        |             |               |              |
| CRC-9 |                               | nonsense +<br>frameshift   | G13D        |             |               |              |

\* indicates mutation identified upon manual review of sequencing data  
(these events not included in overall significance analysis)

Supplementary Table 3: *List of Genes Recurrently Mutated or Rearranged*

| Gene    | Tumors with Alterations | Gene_length (bp) | Number of rearrangements | Tumors with Rearrangements | coding_length (bp) | Number of Mutations | Tumors with Mutations |
|---------|-------------------------|------------------|--------------------------|----------------------------|--------------------|---------------------|-----------------------|
| APC     | 7                       | 138,719          | 0                        | 0                          | 8,532              | 11                  | 7                     |
| IMMP2L  | 6                       | 899,238          | 7                        | 5                          | 528                | 1                   | 1                     |
| MACROD2 | 6                       | 2,057,696        | 15                       | 6                          | 1,278              | 0                   | 0                     |
| A2BP1   | 5                       | 1,694,209        | 17                       | 5                          | 1,257              | 0                   | 0                     |
| FHIT    | 5                       | 1,502,098        | 8                        | 5                          | 444                | 0                   | 0                     |
| KRAS    | 5                       | 45,675           | 0                        | 0                          | 570                | 5                   | 5                     |
| TP53    | 5                       | 19,144           | 0                        | 0                          | 1,182              | 5                   | 5                     |
| TTN     | 5                       | 281,432          | 0                        | 0                          | 100,270            | 7                   | 5                     |
| CADM2   | 3                       | 1,115,445        | 3                        | 3                          | 1,314              | 0                   | 0                     |
| COL4A5  | 3                       | 257,622          | 2                        | 1                          | 5,067              | 2                   | 2                     |
| COL6A3  | 3                       | 90,196           | 0                        | 0                          | 9,534              | 3                   | 3                     |
| CSMD3   | 3                       | 1,214,086        | 1                        | 1                          | 11,124             | 3                   | 2                     |
| FAM190A | 3                       | 1,474,686        | 5                        | 3                          | 2,703              | 0                   | 0                     |
| PRMT8   | 3                       | 102,714          | 2                        | 2                          | 1,185              | 1                   | 1                     |
| AGBL4   | 2                       | 1,491,100        | 2                        | 2                          | 1,512              | 0                   | 0                     |
| AKAP9   | 2                       | 169,798          | 0                        | 0                          | 11,724             | 2                   | 2                     |
| ANK1    | 2                       | 243,537          | 2                        | 2                          | 5,694              | 0                   | 0                     |
| ATG2A   | 2                       | 22,718           | 1                        | 1                          | 5,817              | 1                   | 1                     |
| ATRN1   | 2                       | 855,373          | 1                        | 1                          | 4,140              | 1                   | 1                     |
| B4GALT5 | 2                       | 80,939           | 1                        | 1                          | 1,167              | 1                   | 1                     |
| C2orf78 | 2                       | 32,959           | 0                        | 0                          | 2,769              | 2                   | 2                     |
| CASS4   | 2                       | 47,229           | 1                        | 1                          | 2,361              | 1                   | 1                     |
| CNTNAP5 | 2                       | 890,000          | 1                        | 1                          | 3,921              | 1                   | 1                     |
| DLC1    | 2                       | 431,558          | 0                        | 0                          | 4,587              | 2                   | 2                     |
| DPP6    | 2                       | 1,101,577        | 3                        | 2                          | 2,598              | 0                   | 0                     |
| DYM     | 2                       | 416,908          | 2                        | 2                          | 2,010              | 0                   | 0                     |
| EMR1    | 2                       | 52,883           | 0                        | 0                          | 2,661              | 2                   | 2                     |
| FAT3    | 2                       | 544,374          | 0                        | 0                          | 13,674             | 2                   | 2                     |
| FER1L5  | 2                       | 62,051           | 0                        | 0                          | 6,282              | 2                   | 2                     |
| FSTL4   | 2                       | 416,072          | 3                        | 2                          | 2,529              | 0                   | 0                     |
| GABBR2  | 2                       | 420,810          | 0                        | 0                          | 2,826              | 2                   | 2                     |

|           |   |           |   |   |        |   |   |
|-----------|---|-----------|---|---|--------|---|---|
| HECW2     | 2 | 393,359   | 1 | 1 | 4,719  | 1 | 1 |
| LPXN      | 2 | 51,294    | 2 | 2 | 1,176  | 0 | 0 |
| MED12L    | 2 | 347,135   | 2 | 1 | 6,438  | 1 | 1 |
| MGAM      | 2 | 110,868   | 0 | 0 | 5,574  | 2 | 2 |
| NBEA      | 2 | 730,418   | 1 | 1 | 8,841  | 1 | 1 |
| NLRC5     | 2 | 94,027    | 1 | 1 | 5,601  | 1 | 1 |
| NLRP4     | 2 | 45,277    | 1 | 1 | 2,985  | 1 | 1 |
| NRAS      | 2 | 12,438    | 0 | 0 | 570    | 2 | 2 |
| NRG1      | 2 | 1,125,291 | 4 | 1 | 1,938  | 1 | 1 |
| PAK7      | 2 | 301,651   | 5 | 2 | 2,160  | 0 | 0 |
| PARK2     | 2 | 1,380,245 | 5 | 2 | 1,398  | 0 | 0 |
| PDZRN4    | 2 | 386,143   | 0 | 0 | 3,111  | 2 | 2 |
| PLXNA4    | 2 | 525,357   | 0 | 0 | 5,685  | 2 | 2 |
| PRKG1     | 2 | 1,304,330 | 2 | 2 | 2,061  | 0 | 0 |
| PTPRD     | 2 | 2,298,264 | 2 | 2 | 5,739  | 0 | 0 |
| PUS7L     | 2 | 30,185    | 1 | 1 | 2,106  | 1 | 1 |
| RALGAPA2  | 2 | 319,856   | 1 | 1 | 5,622  | 1 | 1 |
| RGMB      | 2 | 27,198    | 1 | 1 | 1,437  | 1 | 1 |
| RYR2      | 2 | 791,587   | 5 | 2 | 14,904 | 1 | 1 |
| RYR3      | 2 | 555,127   | 0 | 0 | 14,613 | 2 | 2 |
| SCN1A     | 2 | 84,480    | 3 | 1 | 6,030  | 1 | 1 |
| SLC24A3   | 2 | 510,252   | 8 | 2 | 1,935  | 0 | 0 |
| SMAD4     | 2 | 54,827    | 0 | 0 | 1,659  | 2 | 2 |
| SPAG16    | 2 | 1,126,110 | 2 | 2 | 1,896  | 0 | 0 |
| STXBP5L   | 2 | 516,559   | 0 | 0 | 3,561  | 2 | 2 |
| SYNGAP1   | 2 | 33,620    | 1 | 1 | 4,032  | 1 | 1 |
| TACC1     | 2 | 124,843   | 5 | 2 | 2,418  | 0 | 0 |
| TBC1D9B   | 2 | 45,786    | 0 | 0 | 3,753  | 2 | 2 |
| TCF7L2    | 2 | 217,426   | 2 | 1 | 1,809  | 1 | 1 |
| TMPRSS11F | 2 | 76,672    | 1 | 1 | 1,317  | 1 | 1 |
| TOPBP1    | 2 | 61,289    | 0 | 0 | 4,569  | 2 | 2 |
| TTC28     | 2 | 701,850   | 4 | 2 | 7,446  | 0 | 0 |
| VKORC1L1  | 2 | 81,544    | 2 | 2 | 531    | 0 | 0 |
| WNK1      | 2 | 158,394   | 0 | 0 | 7,149  | 2 | 2 |
| ZFHX3     | 2 | 275,749   | 2 | 2 | 11,112 | 0 | 0 |
| ZHX2      | 2 | 192,855   | 2 | 2 | 2,514  | 0 | 0 |
| ZMAT4     | 2 | 367,228   | 6 | 2 | 690    | 0 | 0 |

Supplementary Table 5: *Primers Used in Validation Studies*  
*Screening for VTI1A-TCF7L2 Fusion Across cDNA set*

First Round PCR

|               |                      |
|---------------|----------------------|
| 5' UTR VTI1A  | TTTCCCTGACCTAGGCTTTG |
| Exon 6 TCF7L2 | GGATGGGGGATTTGTCCTAC |

Nested PCR

|               |                      |
|---------------|----------------------|
| Exon 1 VTI1A  | CCGACTTCGAAGGTTACGAG |
| Exon 5 TCF7L2 | TACGTCGGCTGGTAAGTGTG |

*Real-Time PCR primers for Quantification of VTI1A-TCF7L2 knockdown*

|               |                       |
|---------------|-----------------------|
| qRT-PCR set1A | TGGTTGCAAATGTGGAGAAA  |
| qRT-PCR set1B | GCACCACTGGCACTTTGTTA  |
| qRT-PCR set2A | CAGCTTGAAGAAGCGAAAGAA |
| qRT-PCR set2B | ACGTGATAAGAGGCGTGAGG  |

Supplementary Note:

Human Research Subjects

The patients whose cancer and germline DNA were sequenced in this report were recruited at the time of their already scheduled surgery as part of the treatment for their colorectal cancer diagnosis. Patients were subjected to informed consent for the collection of their tumor for use in research studies, including those involving genomic analysis. Among patients whose tumors were collected and provided to our team as part of collaborative research, cases were selected based upon availability of DNA and pathologic and computational estimates of tumor purity and ploidy.
